# Supplementary material
Source: publisher figshare collection journal article supplement (https://acs.figshare.com/ndownloader/files/4574956)
Supplement: Supplementary file 1 [file 4574956]

  
data_k07188 
  
_audit_creation_method            SHELXL-97 
_chemical_name_systematic 
; 
 ? 
; 
_chemical_name_common             ? 
_chemical_melting_point           ? 
_chemical_formula_moiety          'C19 H23 N O3' 
_chemical_formula_sum 
 'C19 H23 N O3' 
_chemical_formula_weight          313.38 
  
loop_ 
 _atom_type_symbol 
 _atom_type_description 
 _atom_type_scat_dispersion_real 
 _atom_type_scat_dispersion_imag 
 _atom_type_scat_source 
 'C'  'C'   0.0033   0.0016 
 'International Tables Vol C Tables 4.2.6.8 and 6.1.1.4' 
 'H'  'H'   0.0000   0.0000 
 'International Tables Vol C Tables 4.2.6.8 and 6.1.1.4' 
 'N'  'N'   0.0061   0.0033 
 'International Tables Vol C Tables 4.2.6.8 and 6.1.1.4' 
 'O'  'O'   0.0106   0.0060 
 'International Tables Vol C Tables 4.2.6.8 and 6.1.1.4' 
  
_symmetry_cell_setting            Triclinic 
_symmetry_space_group_name_H-M    'P -1' 
_symmetry_space_group_name_Hall    '-P 1' 
  
loop_ 
 _symmetry_equiv_pos_as_xyz 
 'x, y, z' 
 '-x, -y, -z' 
  
_cell_length_a                    5.6973(4) 
_cell_length_b                    9.7733(10) 
_cell_length_c                    15.2597(15) 
_cell_angle_alpha                 76.194(4) 
_cell_angle_beta                  79.635(5) 
_cell_angle_gamma                 85.476(5) 
_cell_volume                      811.09(13) 
_cell_formula_units_Z             2 
_cell_measurement_temperature     150(1) 
_cell_measurement_reflns_used     7973 
_cell_measurement_theta_min       2.8 
_cell_measurement_theta_max       25.0 
  
_exptl_crystal_description        'needle' 
_exptl_crystal_colour             'colourless' 
_exptl_crystal_size_max           0.40 
_exptl_crystal_size_mid           0.12 
_exptl_crystal_size_min           0.03 
_exptl_crystal_density_meas       ? 
_exptl_crystal_density_diffrn     1.283 
_exptl_crystal_density_method     'not measured' 
_exptl_crystal_F_000              336 
_exptl_absorpt_coefficient_mu     0.086 
# Absorption correction 
  
_exptl_absorpt_correction_type 'multi-scan' 
_exptl_absorpt_correction_T_min  0.772 
_exptl_absorpt_correction_T_max  1.001 
_exptl_absorpt_process_details 
; 
multi-scan from symmetry-related measurements 
 Sortav (Blessing 1995) 
; 
  
  
_exptl_special_details 
; 
 ? 
; 
  
_diffrn_ambient_temperature       150(2) 
_diffrn_radiation_wavelength      0.71073 
_diffrn_radiation_type            MoK\a 
_diffrn_radiation_source          'fine-focus sealed tube' 
_diffrn_radiation_monochromator   graphite 
_diffrn_measurement_device_type   'Bruker-Nonius KappaCCD' 
_diffrn_measurement_method        '\f scans and \w scans with \k offsets' 
_diffrn_detector_area_resol_mean  9 
_diffrn_standards_number          0 
_diffrn_standards_interval_count  ? 
_diffrn_standards_interval_time   ? 
_diffrn_standards_decay_%         ? 
_diffrn_reflns_number             7973 
_diffrn_reflns_av_R_equivalents   0.0736 
_diffrn_reflns_av_sigmaI/netI     0.0760 
_diffrn_reflns_limit_h_min        -6 
_diffrn_reflns_limit_h_max        6 
_diffrn_reflns_limit_k_min        -11 
_diffrn_reflns_limit_k_max        11 
_diffrn_reflns_limit_l_min        -18 
_diffrn_reflns_limit_l_max        18 
_diffrn_reflns_theta_min          2.79 
_diffrn_reflns_theta_max          25.00 
_reflns_number_total              2839 
_reflns_number_gt                 1821 
_reflns_threshold_expression     'I>2\s(I)' 
  
_computing_data_collection        'Collect (Nonius B.V., 1997-2002)' 
_computing_cell_refinement        'Denzo-SMN (Otwinowski & Minor, 1997)' 
_computing_data_reduction         'Denzo-SMN' 
_computing_structure_solution     'SIR-92 (Altomare et al., 1994)' 
_computing_structure_refinement   'SHELXTL V6.1(Sheldrick, 2001)' 
_computing_molecular_graphics     'SHELXTL V6.1' 
_computing_publication_material   'SHELXTL V6.1' 
  
  
_refine_special_details 
; 
 Refinement of F^2^ against ALL reflections.  The weighted R-factor wR and 
 goodness of fit S are based on F^2^, conventional R-factors R are based 
 on F, with F set to zero for negative F^2^. The threshold expression of 
 F^2^ > 2sigma(F^2^) is used only for calculating R-factors(gt) etc. and is 
 not relevant to the choice of reflections for refinement.  R-factors based 
 on F^2^ are statistically about twice as large as those based on F, and R- 
 factors based on ALL data will be even larger. 
; 
  
_refine_ls_structure_factor_coef  Fsqd 
_refine_ls_matrix_type            full 
_refine_ls_weighting_scheme       calc 
_refine_ls_weighting_details 
 'calc w=1/[\s^2^(Fo^2^)+(0.0762P)^2^+0.1059P] where P=(Fo^2^+2Fc^2^)/3' 
_atom_sites_solution_primary      direct 
_atom_sites_solution_secondary    difmap 
_atom_sites_solution_hydrogens    geom 
_refine_ls_hydrogen_treatment     constr 
_refine_ls_extinction_method      none 
_refine_ls_extinction_coef        ? 
_refine_ls_number_reflns          2839 
_refine_ls_number_parameters      212 
_refine_ls_number_restraints      0 
_refine_ls_R_factor_all           0.0996 
_refine_ls_R_factor_gt            0.0565 
_refine_ls_wR_factor_ref          0.1558 
_refine_ls_wR_factor_gt           0.1289 
_refine_ls_goodness_of_fit_ref    1.013 
_refine_ls_restrained_S_all       1.013 
_refine_ls_shift/su_max           0.000 
_refine_ls_shift/su_mean          0.000 
  
loop_ 
 _atom_site_label 
 _atom_site_type_symbol 
 _atom_site_fract_x 
 _atom_site_fract_y 
 _atom_site_fract_z 
 _atom_site_U_iso_or_equiv 
 _atom_site_adp_type 
 _atom_site_occupancy 
 _atom_site_symmetry_multiplicity 
 _atom_site_calc_flag 
 _atom_site_refinement_flags 
 _atom_site_disorder_assembly 
 _atom_site_disorder_group 
O1 O 0.4040(3) 0.05347(19) 0.26410(12) 0.0390(5) Uani 1 1 d . . . 
O2 O 0.6805(3) 0.21841(18) 0.19252(12) 0.0371(5) Uani 1 1 d . . . 
O3 O -0.4781(3) 0.31408(18) 0.52862(12) 0.0395(5) Uani 1 1 d . . . 
N1 N 0.3595(3) 0.2787(2) 0.28465(13) 0.0333(5) Uani 1 1 d . . . 
C1 C 0.1426(4) 0.2643(3) 0.34874(16) 0.0308(6) Uani 1 1 d . . . 
C2 C 0.0017(4) 0.1489(3) 0.38391(17) 0.0372(6) Uani 1 1 d . . . 
H2A H 0.0458 0.0619 0.3669 0.045 Uiso 1 1 calc R . . 
C3 C -0.2089(4) 0.1634(3) 0.44561(17) 0.0360(6) Uani 1 1 d . . . 
H3A H -0.3081 0.0851 0.4709 0.043 Uiso 1 1 calc R . . 
C4 C -0.2728(4) 0.2906(3) 0.46977(16) 0.0333(6) Uani 1 1 d . . . 
C5 C -0.1268(4) 0.4062(3) 0.43380(16) 0.0340(6) Uani 1 1 d . . . 
H5A H -0.1703 0.4936 0.4504 0.041 Uiso 1 1 calc R . . 
C6 C 0.0805(4) 0.3919(3) 0.37408(16) 0.0322(6) Uani 1 1 d . . . 
C7 C 0.2621(4) 0.5006(3) 0.32754(16) 0.0338(6) Uani 1 1 d . . . 
H7A H 0.3359 0.5348 0.3727 0.041 Uiso 1 1 calc R . . 
C8 C 0.1707(4) 0.6258(3) 0.25505(18) 0.0384(7) Uani 1 1 d . . . 
H8A H 0.0161 0.6734 0.2761 0.046 Uiso 1 1 calc R . . 
C9 C 0.3801(5) 0.7204(3) 0.21705(18) 0.0433(7) Uani 1 1 d . . . 
H9 H 0.3950 0.8109 0.2279 0.052 Uiso 1 1 calc R . . 
C10 C 0.5395(4) 0.6534(3) 0.16557(19) 0.0418(7) Uani 1 1 d . . . 
H10 H 0.6897 0.6874 0.1331 0.050 Uiso 1 1 calc R . . 
C11 C 0.4400(4) 0.5139(3) 0.16782(17) 0.0358(6) Uani 1 1 d . . . 
H11A H 0.5105 0.4683 0.1164 0.043 Uiso 1 1 calc R . . 
C12 C 0.4501(4) 0.4231(3) 0.26648(17) 0.0335(6) Uani 1 1 d . . . 
H12A H 0.6130 0.4211 0.2827 0.040 Uiso 1 1 calc R . . 
C13 C 0.1723(4) 0.5539(3) 0.17551(18) 0.0403(7) Uani 1 1 d . . . 
H13A H 0.0707 0.4709 0.1927 0.048 Uiso 1 1 calc R . . 
H13B H 0.1310 0.6199 0.1198 0.048 Uiso 1 1 calc R . . 
C14 C 0.4770(4) 0.1725(3) 0.24810(17) 0.0340(6) Uani 1 1 d . . . 
C15 C 0.8107(4) 0.1350(3) 0.12872(17) 0.0374(7) Uani 1 1 d . . . 
C16 C 0.6486(4) 0.1150(3) 0.06397(19) 0.0474(7) Uani 1 1 d . . . 
H16A H 0.5170 0.0554 0.0986 0.071 Uiso 1 1 calc R . . 
H16B H 0.7405 0.0697 0.0171 0.071 Uiso 1 1 calc R . . 
H16C H 0.5840 0.2070 0.0345 0.071 Uiso 1 1 calc R . . 
C17 C 0.9075(4) -0.0044(3) 0.17987(19) 0.0429(7) Uani 1 1 d . . . 
H17A H 0.7745 -0.0649 0.2116 0.064 Uiso 1 1 calc R . . 
H17B H 0.9988 0.0125 0.2246 0.064 Uiso 1 1 calc R . . 
H17C H 1.0118 -0.0510 0.1364 0.064 Uiso 1 1 calc R . . 
C18 C 1.0127(4) 0.2313(3) 0.07816(19) 0.0447(7) Uani 1 1 d . . . 
H18A H 0.9461 0.3236 0.0503 0.067 Uiso 1 1 calc R . . 
H18B H 1.1085 0.1897 0.0303 0.067 Uiso 1 1 calc R . . 
H18C H 1.1139 0.2427 0.1213 0.067 Uiso 1 1 calc R . . 
C19 C -0.6314(4) 0.1990(3) 0.56712(18) 0.0420(7) Uani 1 1 d . . . 
H19A H -0.7668 0.2281 0.6091 0.063 Uiso 1 1 calc R . . 
H19B H -0.5426 0.1198 0.6007 0.063 Uiso 1 1 calc R . . 
H19C H -0.6903 0.1700 0.5181 0.063 Uiso 1 1 calc R . . 
  
loop_ 
 _atom_site_aniso_label 
 _atom_site_aniso_U_11 
 _atom_site_aniso_U_22 
 _atom_site_aniso_U_33 
 _atom_site_aniso_U_23 
 _atom_site_aniso_U_13 
 _atom_site_aniso_U_12 
O1 0.0379(10) 0.0339(11) 0.0461(11) -0.0137(9) -0.0024(8) -0.0028(9) 
O2 0.0315(9) 0.0394(11) 0.0413(10) -0.0148(9) -0.0015(8) 0.0004(8) 
O3 0.0377(9) 0.0366(11) 0.0422(11) -0.0120(9) 0.0045(8) -0.0062(8) 
N1 0.0330(11) 0.0330(13) 0.0343(12) -0.0103(10) -0.0040(9) 0.0001(9) 
C1 0.0289(12) 0.0350(15) 0.0292(14) -0.0088(12) -0.0056(11) 0.0003(11) 
C2 0.0384(14) 0.0359(16) 0.0405(16) -0.0156(13) -0.0052(12) -0.0012(12) 
C3 0.0387(14) 0.0333(15) 0.0367(15) -0.0092(12) -0.0047(12) -0.0056(12) 
C4 0.0327(13) 0.0370(16) 0.0307(14) -0.0100(12) -0.0042(11) -0.0002(12) 
C5 0.0379(13) 0.0320(15) 0.0335(14) -0.0098(12) -0.0061(12) -0.0019(12) 
C6 0.0355(13) 0.0336(15) 0.0293(14) -0.0086(11) -0.0093(11) 0.0007(11) 
C7 0.0335(13) 0.0360(16) 0.0331(14) -0.0096(12) -0.0059(11) -0.0029(11) 
C8 0.0341(13) 0.0359(16) 0.0425(16) -0.0074(13) -0.0032(12) 0.0023(12) 
C9 0.0437(15) 0.0353(16) 0.0477(17) -0.0030(14) -0.0075(13) -0.0033(13) 
C10 0.0355(14) 0.0411(17) 0.0442(16) -0.0036(14) -0.0020(12) -0.0021(13) 
C11 0.0371(13) 0.0374(16) 0.0315(14) -0.0067(12) -0.0034(11) -0.0023(12) 
C12 0.0311(12) 0.0350(15) 0.0345(14) -0.0085(11) -0.0052(11) -0.0004(11) 
C13 0.0394(14) 0.0437(17) 0.0363(15) -0.0035(13) -0.0095(12) -0.0034(13) 
C14 0.0286(13) 0.0426(18) 0.0313(14) -0.0089(13) -0.0077(11) 0.0030(13) 
C15 0.0319(13) 0.0457(17) 0.0376(15) -0.0177(13) -0.0052(11) 0.0040(12) 
C16 0.0385(14) 0.064(2) 0.0433(16) -0.0167(15) -0.0112(12) -0.0011(14) 
C17 0.0372(14) 0.0465(17) 0.0480(17) -0.0179(14) -0.0082(12) 0.0050(13) 
C18 0.0351(13) 0.0524(19) 0.0446(16) -0.0111(14) -0.0017(12) -0.0013(13) 
C19 0.0419(14) 0.0403(17) 0.0413(16) -0.0084(13) 0.0009(12) -0.0073(13) 
  
_geom_special_details 
; 
 All esds (except the esd in the dihedral angle between two l.s. planes) 
 are estimated using the full covariance matrix.  The cell esds are taken 
 into account individually in the estimation of esds in distances, angles 
 and torsion angles; correlations between esds in cell parameters are only 
 used when they are defined by crystal symmetry.  An approximate (isotropic) 
 treatment of cell esds is used for estimating esds involving l.s. planes. 
; 
  
loop_ 
 _geom_bond_atom_site_label_1 
 _geom_bond_atom_site_label_2 
 _geom_bond_distance 
 _geom_bond_site_symmetry_2 
 _geom_bond_publ_flag 
O1 C14 1.221(3) . ? 
O2 C14 1.346(3) . ? 
O2 C15 1.478(3) . ? 
O3 C4 1.380(3) . ? 
O3 C19 1.424(3) . ? 
N1 C14 1.367(3) . ? 
N1 C1 1.425(3) . ? 
N1 C12 1.488(3) . ? 
C1 C2 1.380(3) . ? 
C1 C6 1.393(3) . ? 
C2 C3 1.406(3) . ? 
C3 C4 1.383(4) . ? 
C4 C5 1.400(3) . ? 
C5 C6 1.375(3) . ? 
C6 C7 1.501(3) . ? 
C7 C12 1.561(3) . ? 
C7 C8 1.567(3) . ? 
C8 C9 1.511(4) . ? 
C8 C13 1.539(4) . ? 
C9 C10 1.329(4) . ? 
C10 C11 1.508(4) . ? 
C11 C13 1.535(3) . ? 
C11 C12 1.563(3) . ? 
C15 C17 1.517(4) . ? 
C15 C18 1.520(3) . ? 
C15 C16 1.522(3) . ? 
  
loop_ 
 _geom_angle_atom_site_label_1 
 _geom_angle_atom_site_label_2 
 _geom_angle_atom_site_label_3 
 _geom_angle 
 _geom_angle_site_symmetry_1 
 _geom_angle_site_symmetry_3 
 _geom_angle_publ_flag 
C14 O2 C15 120.7(2) . . ? 
C4 O3 C19 117.43(19) . . ? 
C14 N1 C1 124.9(2) . . ? 
C14 N1 C12 124.0(2) . . ? 
C1 N1 C12 110.99(19) . . ? 
C2 C1 C6 121.2(2) . . ? 
C2 C1 N1 129.6(2) . . ? 
C6 C1 N1 109.2(2) . . ? 
C1 C2 C3 118.3(2) . . ? 
C4 C3 C2 120.6(2) . . ? 
O3 C4 C3 124.1(2) . . ? 
O3 C4 C5 115.6(2) . . ? 
C3 C4 C5 120.3(2) . . ? 
C6 C5 C4 119.2(2) . . ? 
C5 C6 C1 120.4(2) . . ? 
C5 C6 C7 128.3(2) . . ? 
C1 C6 C7 111.3(2) . . ? 
C6 C7 C12 104.24(19) . . ? 
C6 C7 C8 114.52(18) . . ? 
C12 C7 C8 102.22(19) . . ? 
C9 C8 C13 100.7(2) . . ? 
C9 C8 C7 105.49(18) . . ? 
C13 C8 C7 100.8(2) . . ? 
C10 C9 C8 107.1(2) . . ? 
C9 C10 C11 108.0(2) . . ? 
C10 C11 C13 100.6(2) . . ? 
C10 C11 C12 105.0(2) . . ? 
C13 C11 C12 100.71(19) . . ? 
N1 C12 C7 104.27(19) . . ? 
N1 C12 C11 114.56(19) . . ? 
C7 C12 C11 102.85(19) . . ? 
C11 C13 C8 93.56(18) . . ? 
O1 C14 O2 125.6(2) . . ? 
O1 C14 N1 123.9(2) . . ? 
O2 C14 N1 110.5(2) . . ? 
O2 C15 C17 111.4(2) . . ? 
O2 C15 C18 101.4(2) . . ? 
C17 C15 C18 110.9(2) . . ? 
O2 C15 C16 109.53(18) . . ? 
C17 C15 C16 112.0(2) . . ? 
C18 C15 C16 111.1(2) . . ? 
  
_diffrn_measured_fraction_theta_max    0.994 
_diffrn_reflns_theta_full              25.00 
_diffrn_measured_fraction_theta_full   0.994 
_refine_diff_density_max    0.206 
_refine_diff_density_min   -0.234 
_refine_diff_density_rms    0.049 
